# Supplementary material for: Strain-induced charge delocalization achieves ultralow exciton binding energy toward efficient photocatalysis
Source: Royal Society of Chemistry journal article supplement (doi:10.1039/d4sc05873a), 2024-01-01
Supplement: d4sc05873a1.pdf [file d4sc05873a1.pdf]

## Supporting Information

### Strain-induced charge delocalization achieves ultralow exciton binding energy toward efficient photocatalysis

Junyuan Duan,<sup>‡ab</sup> Yinghe Zhao,<sup>‡a</sup> Yu Wu,<sup>a</sup> Youwen Liu,<sup>\*a</sup> Junnian Chen,<sup>c</sup> Ruouo Yang,<sup>a</sup> Jiazhao Huang,<sup>a</sup> Chuanqi Luo,<sup>a</sup> Mao Wu,<sup>a</sup> Xiaodong Zheng,<sup>d</sup> Pengyu Li,<sup>a</sup> Xueliang Jiang,<sup>\*b</sup> Jianguo Guan<sup>\*c</sup> and Tianyou Zhai<sup>a</sup>

<sup>a</sup>State Key Laboratory of Materials Processing and Die & Mould Technology, and School of Materials Science and Engineering, Huazhong University of Science and Technology, Wuhan 430074, China;

<sup>b</sup>Hubei Key Laboratory of Plasma Chemistry and New Materials, School of Materials Science and Engineering, Key Laboratory of Green Chemical Engineering Process of Ministry of Education, Engineering Research Center of Phosphorus Resources Development and Utilization of Ministry of Education, Wuhan Institute of Technology, Wuhan 430205, China;

<sup>c</sup>State Key Laboratory of Advanced Technology for Materials Synthesis and Processing, Wuhan University of Technology, Wuhan 430070, China;

<sup>d</sup>Department of Applied Physics, The Hong Kong Polytechnic University, Kowloon, Hong Kong, China;

<sup>e</sup>School of Materials Science & Engineering, Hubei University, Wuhan 430062, China

\* **Corresponding authors.** E-mail: ywliu@hust.edu.cn, guanjg@whut.edu.cn, jiangxl@wit.edu.cn

‡ These authors contributed equally to this work.

## **Experimental**

### **Samples synthesis**

s-Ta<sub>2</sub>O<sub>5</sub> NRs were prepared by a hydrothermal route. A mixture of 52 mL of water, 100 mg of tantalum powders, 325  $\mu$ L of hydrofluoric acid, and 15 mL of a 30 wt% hydrogen peroxide solution was prepared and transferred into a 100 mL Teflon-lined autoclave. This autoclave was subsequently heated to 240 °C for 12 hours inside an oven. Upon cooling down to room temperature naturally, the resulting white precipitate was isolated by centrifugation, thoroughly rinsed with ethanol and water, and then dried at 60°C for 6 hours, yielding a dry white powder. Ta<sub>2</sub>O<sub>5</sub> NRs were produced by annealing the s-Ta<sub>2</sub>O<sub>5</sub> nanorod samples at 750 °C for 4 hours in a tubular furnace, under atmospheric air, and allowing them to cool naturally.

### **Characterizations**

The samples were characterized using X-ray diffractometer (XRD, Cu K $\alpha$ ,  $\lambda$  = 1.5405 Å, D2 PHASER, Bruker), a confocal Raman system (Alpha 300RS+, WITec), scanning electron microscopy (SEM, Hitachi S-4800), and high-resolution transmission electron microscopy (HRTEM, FEI Tecnai G2 F30) with an X-ray energy dispersive spectrometer (EDS), a spherical aberration-corrected high-resolution transmission electron microscope (Thermofisher Themis Z, FEI), atomic force microscopy (AFM, Dimension Icon, Bruker), electron spin resonance spectrometer (Bruker EMXplus A300), X-ray photoelectron spectroscopy (XPS, AXIS-ULTRA DLD-600W), UV-Vis spectrophotometer (UV-3600i Plus, Shimadzu), X-ray absorption fine structure spectra (XAFS) were collected at the BL11B beamline of the Shanghai Synchrotron Radiation Facility (SSRF). Electrochemical impedance spectra (EIS) were recorded in a 1M Na<sub>2</sub>SO<sub>4</sub> solution at -1.7 V (vs. Ag/AgCl) over a frequency range of 0.1 to 10<sup>6</sup> Hz, with a 10 mV amplitude, on an electrochemical workstation (CHI760E, Chenhua). The samples were mounted on an Au substrate for surface potential measurements using AFM with a Kelvin probe. Temperature-dependent photoluminescence (PL) spectra and time-resolved transient PL decay were assessed using an Edinburgh FLS 980 spectrofluorometer with excitation wavelength of 325 nm.

### **Photocatalytic performance test**

Photocatalytic hydrogen production tests are performed in a sealed quartz vessel with a capacity of roughly 150 mL and a diameter of about 6.3 cm. To begin, 80 mg of the catalyst is ultrasonically dispersed in 100 mL of an aqueous methanol solution with a 20% volume fraction. After achieving a uniform dispersion, the mixture is transferred to the reactor. The system utilizes a top-illumination method, with a 300 W high-pressure mercury lamp serving as the light source. The gas products are subsequently analyzed using an online-connected gas chromatograph.

### DFT calculations

DFT calculations were conducted using the Vienna Ab initio Simulation Package (VASP) within the framework of density functional theory (DFT),<sup>1</sup> complemented by post-processing via VASPKIT.<sup>2</sup> The Perdew-Burke-Ernzerhof (PBE) generalized gradient approximation (GGA) was employed for the exchange-correlation potential.<sup>3</sup> The energy cutoff was established at 520 eV. Ion relaxation and electron self-consistency were set to 0.02 eV/Å and  $1 \times 10^{-6}$  eV, respectively. To accurately account for van der Waals forces, the DFT-D3 method with long-range dispersion corrections was applied. Ta<sub>2</sub>O<sub>5</sub> model included 77 atoms, and the K-point grid was chosen to be  $5 \times 1 \times 1$ .

To investigate the bonding characteristics in Ta<sub>2</sub>O<sub>5</sub> with ~3% tensile strain along [001], the electron localization function (ELF) was calculated according to the formula:<sup>4</sup>

$$\text{ELF}(\mathbf{r}) = \{1 + [\mathbf{K}(\mathbf{r})/\text{Kh}[\rho(\mathbf{r})]]^2\}^{-1} \quad (1)$$

$\mathbf{K}(\mathbf{r})$  represents the curvature of the electron pair density for electrons with identical spin states,  $\rho(\mathbf{r})$  is the electron density at position  $\mathbf{r}$ , and  $\text{Kh}[\rho(\mathbf{r})]$  is the curvature of a homogeneous electron gas with the same electron density  $\rho$ .

DFT calculations for the hydrogen evolution reaction (HER) were performed using identical settings and parameters as those for the structural optimization. Atomic positions were refined until the forces on each atom fell below 0.002 eV/Å. Ta<sub>2</sub>O<sub>5</sub> (001) with a 15 Å vacuum layer was utilized. The HER reaction process is depicted as follows:

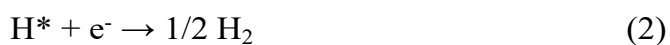

The reaction Gibbs free energy ( $\Delta G$ ) is given by:

$$\Delta G = \Delta E + \Delta E_{\text{ZPE}} - T\Delta S \quad (3)$$

In this equation,  $\Delta E$  is the adsorption energy, and  $T$  is the temperature,  $\Delta E_{\text{ZPE}}$  and  $\Delta S$  are the changes in zero-point energy and entropy, respectively. Considering the negligible vibrational entropy of adsorbed  $\text{H}^*$ , the adsorption entropy for  $1/2\text{H}_2$ , denoted  $\Delta S_{\text{H}}$ , is estimated as  $1/2S^0\text{H}_2$ , where  $S^0\text{H}_2$  is the entropy of gaseous  $\text{H}_2$  under standard conditions.<sup>5</sup>

$E_{\text{b}}$  is described by the Wannier-Mott exciton model, which uses the formula:<sup>6</sup>

$$E_{\text{b}} = \mu E_0 / m_0 \epsilon_r^2 \quad (4)$$

Here, the reduced exciton mass is given by:  $1/\mu = 1/m_e + 1/m_h$ . The Rydberg energy ( $E_0$ ) is 13.6 eV. The dielectric constant  $\epsilon_r$  is calculated using density-functional perturbation theory (DFPT), as implemented in VASP. This process involves computing the permittivity tensor for the bulk unit cell and the Born effective charge tensor, which helps determine the ionic contribution to the dielectric function.<sup>7</sup> The K-point lattice is discretized using an inverse spatial resolution of  $2\pi \times 0.04 \text{ \AA}^{-1}$ , which establishes the density of scattering points. The effective masses of electrons and holes are ascertained through an energy band fitting method, utilizing a program integrated within VASPKIT.

## Supporting Figures

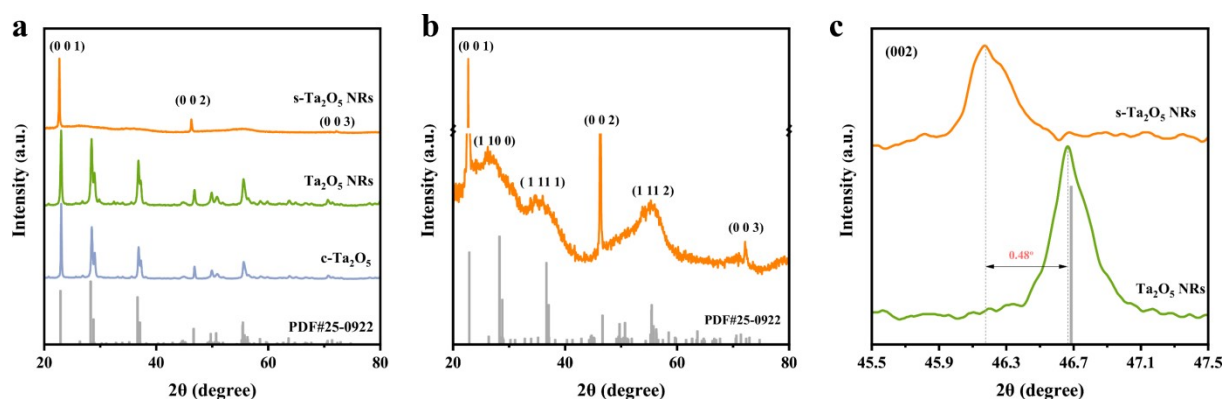

**Fig. S1** XRD patterns of typical s-Ta<sub>2</sub>O<sub>5</sub> NRs. (a) Comparisons of s-Ta<sub>2</sub>O<sub>5</sub>, Ta<sub>2</sub>O<sub>5</sub> NRs, and c-Ta<sub>2</sub>O<sub>5</sub> with standard PDF 250922. (b) Enlarged intensity of the XRD pattern. (c) Enlarged view of the (002) peak in the XRD patterns for both s-Ta<sub>2</sub>O<sub>5</sub> NRs and Ta<sub>2</sub>O<sub>5</sub> NRs. The XRD pattern of the s-Ta<sub>2</sub>O<sub>5</sub> NRs displays distinct diffraction peaks at 2θ angles of approximately 22.71°, 46.28°, and 72.14°, corresponding to the (0 0 1), (0 0 2), and (0 0 3) planes of the orthorhombic Ta<sub>2</sub>O<sub>5</sub> phase (PDF# 25–0922), indicating a preferential orientation along the c-axis. Closer examination reveals additional, though less pronounced, peaks at 2θ values of 26.2°, 36.2°, and 55.3°, associated with the (1 10 0), (1 11 1), and (1 12 1) planes, respectively (Fig. S1b). The broadness and reduced intensity of these peaks suggest lower crystallinity or a partially amorphous nature in these orientations. After annealing at 750 °C, Ta<sub>2</sub>O<sub>5</sub> NRs (Fig. S6) exhibited the diffraction peaks of c-Ta<sub>2</sub>O<sub>5</sub> (Fig. S7) in both position and intensity. Analyzing the XRD patterns for s-Ta<sub>2</sub>O<sub>5</sub> and Ta<sub>2</sub>O<sub>5</sub> NRs shows minor peak shifts in the (0 0 1) and (0 0 2) planes of the s-Ta<sub>2</sub>O<sub>5</sub> NRs sample towards lower angles (Fig. 1c and Fig. S1c), with displacements of 0.24° and 0.48°, respectively. These shifts suggest an expansion in lattice spacing and the introduction of a slight tensile strain within the crystal lattice along the [001] (c-axis).

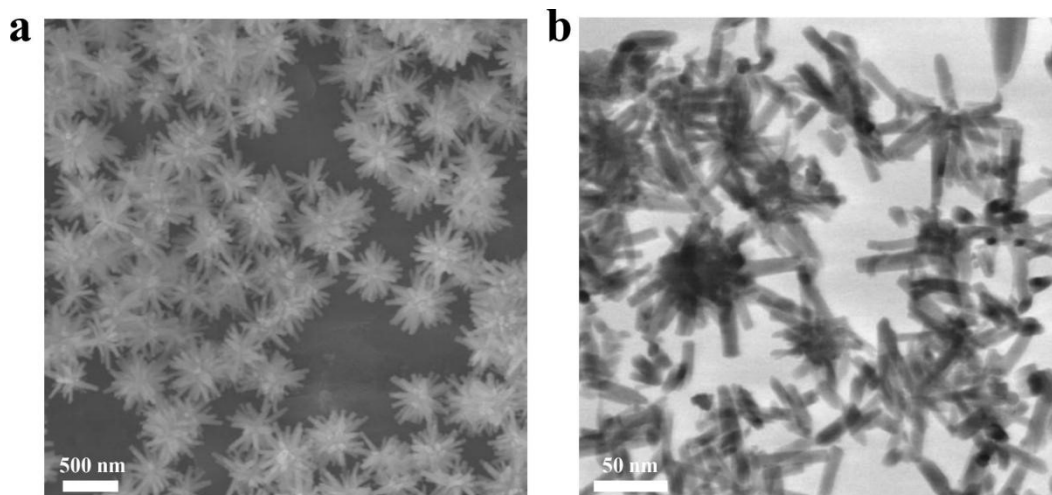

**Fig. S2** Morphology characterization of s-Ta<sub>2</sub>O<sub>5</sub> NRs. (a) SEM and (b) TEM image Fig. S2 demonstrate that the typical s-Ta<sub>2</sub>O<sub>5</sub> NRs exhibits nanorods shapes with diameters ranging from 20 to 50 nm and lengths extending from 100 to 300 nm.

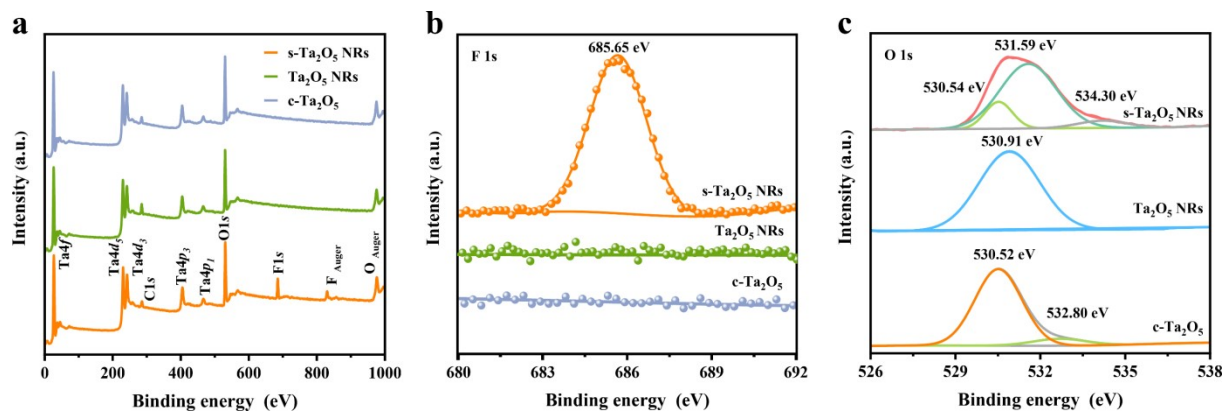

**Fig. S3** XPS spectra of various  $\text{Ta}_2\text{O}_5$  samples. (a) Full spectra, (b) F 1s orbital spectra. (c) O 2p orbital spectra.

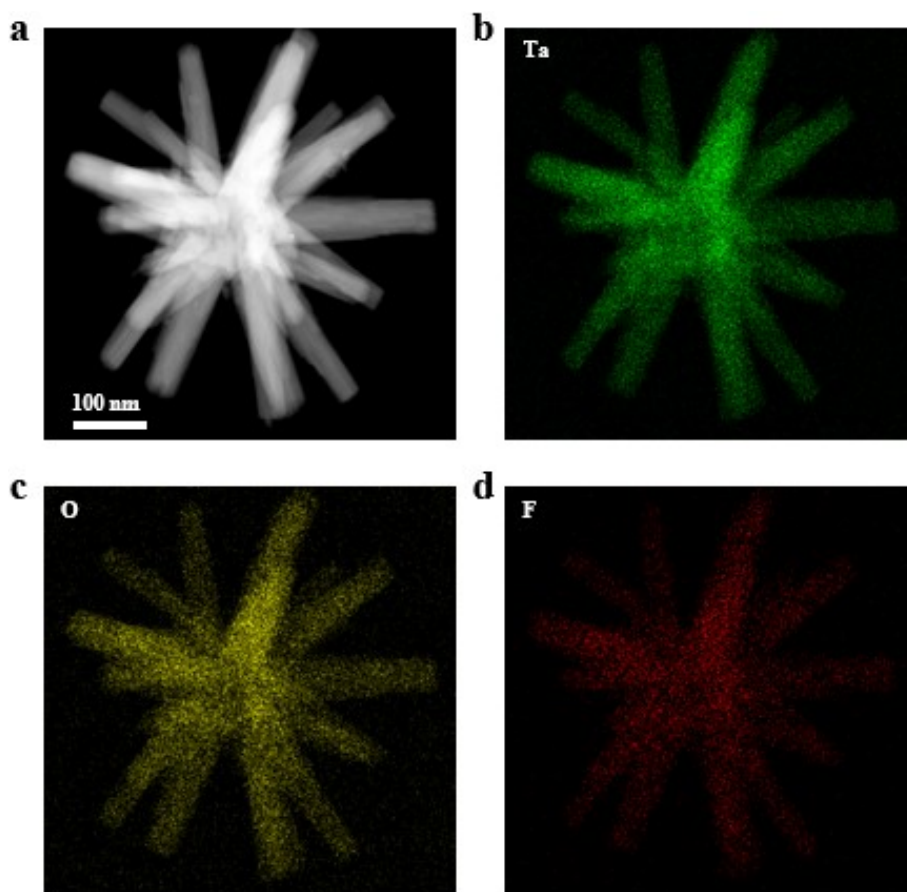

**Fig. S4** EDS mapping of s-Ta<sub>2</sub>O<sub>5</sub> NRs. EDS mapping was utilized to elucidate the distribution of F element within s-Ta<sub>2</sub>O<sub>5</sub> NRs and its consequent effect on the nanorod's structure. Fig. S4 illustrates a homogeneous dispersal of Ta, O, and F elements throughout the nanorods, with a notably weaker signal for F, suggesting its minor presence.



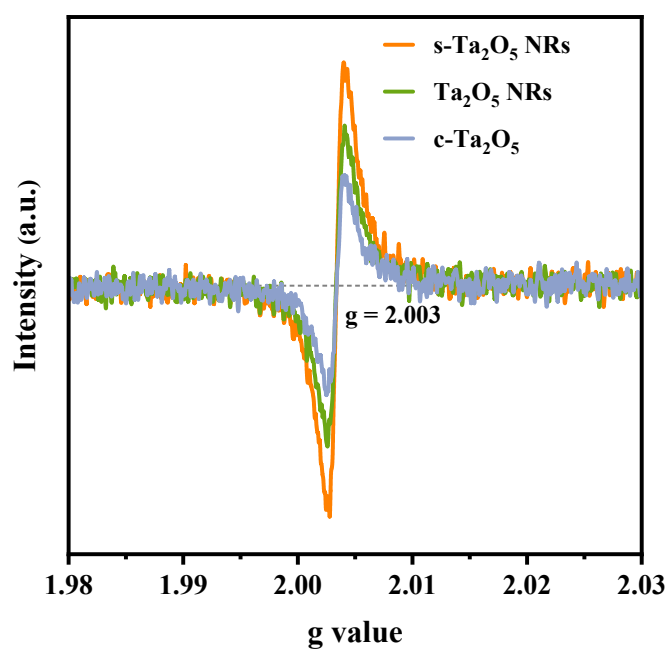

**Fig. S5** ESR spectra of s-Ta<sub>2</sub>O<sub>5</sub> NRs, Ta<sub>2</sub>O<sub>5</sub> NRs and c-Ta<sub>2</sub>O<sub>5</sub>. The ESR signal at  $g=2.003$ , indicative of surface oxygen defects, is clearly observed. Notably, the signal is most pronounced in s-Ta<sub>2</sub>O<sub>5</sub> NRs, implying a higher concentration of oxygen defects.

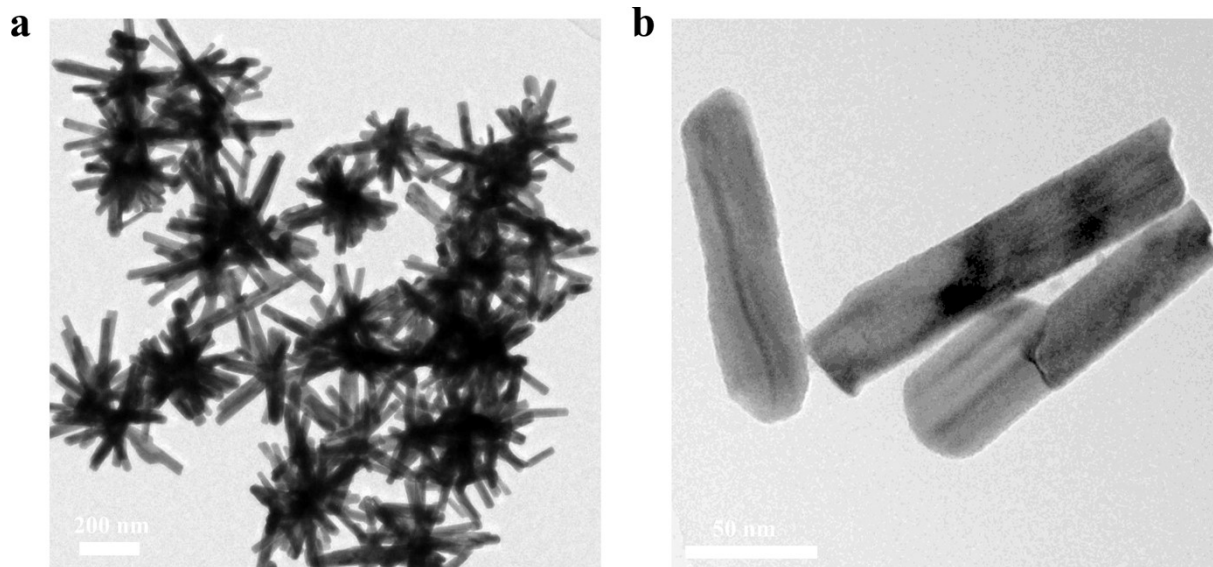

**Fig. S6** TEM images of Ta<sub>2</sub>O<sub>5</sub> NRs. Fig. S6 shows that the Ta<sub>2</sub>O<sub>5</sub> NRs display sizes and shapes comparable to those of s-Ta<sub>2</sub>O<sub>5</sub> NRs (Fig. S2).

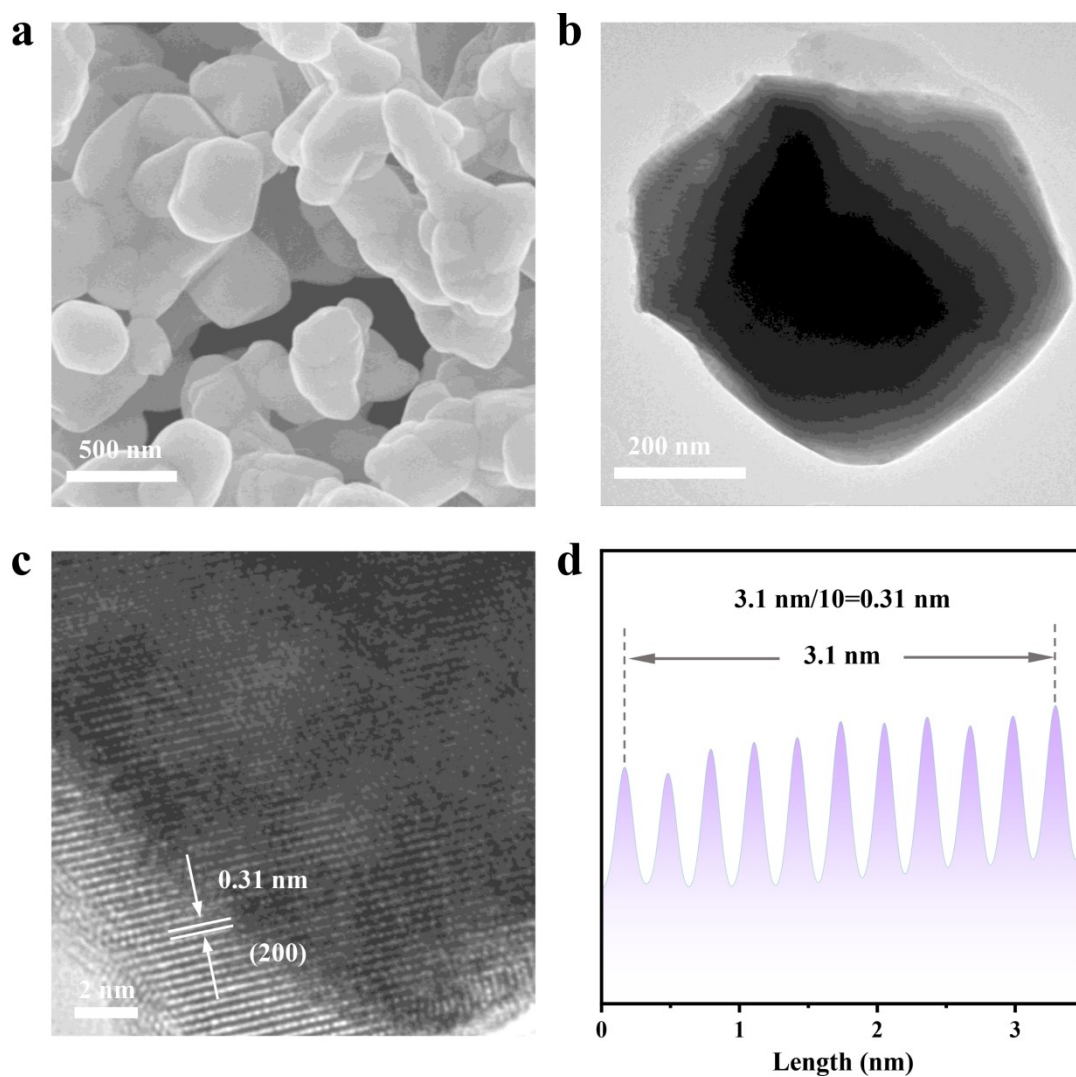

**Fig. S7** Structural characterizations of c-Ta<sub>2</sub>O<sub>5</sub> samples. (a) SEM image. (b) TEM image. (c) HRTEM image. (d) Lattice fringe interplanar spacings. Fig. S7a, b illustrate that c-Ta<sub>2</sub>O<sub>5</sub> particles vary in size from 400 nm to 1 μm. The HRTEM image of c-Ta<sub>2</sub>O<sub>5</sub> shows an interplanar spacing of 0.31 nm for the (200) plane, aligning with the characteristic orthorhombic Ta<sub>2</sub>O<sub>5</sub> crystal structure.

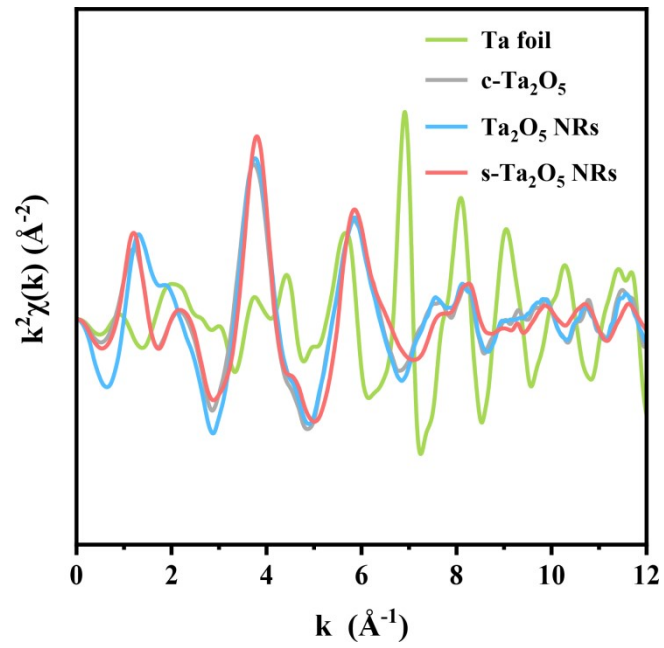

**Fig. S8**  $k^2\chi(k)$  oscillation curves. Fig. S8 distinguishes the low-frequency oscillations characteristic of the lighter oxygen atoms from the high-frequency oscillations associated with the heavier Ta atoms.

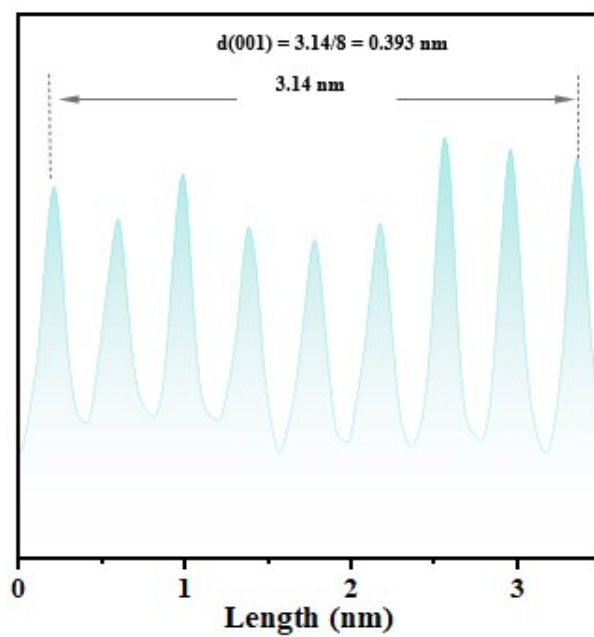

**Fig. S9** Lattice fringe interplanar spacings marked by the red line in Fig. 2a.

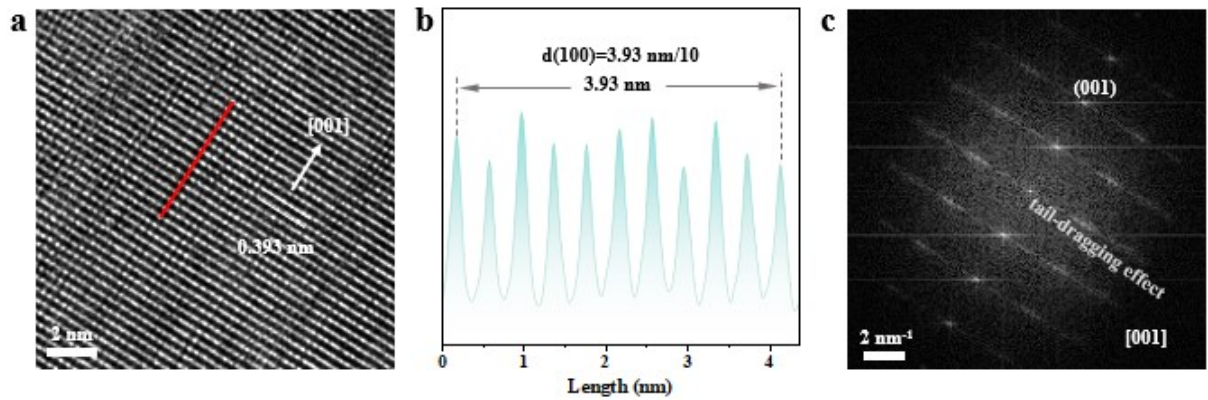

**Fig. S10** Structural characterizations of other s-Ta<sub>2</sub>O<sub>5</sub> NRs via TEM. (a) HRTEM image. (b) Lattice fringe interplanar spacings marked by the red line in Fig. S10a. (c) FFT pattern corresponding to Fig. S10a. Fig. S10a, b reveal that the average interplanar spacings of the (001) plane is 0.393 nm, slightly larger than that in typical Ta<sub>2</sub>O<sub>5</sub> crystal, indicating a tensile strain along the [001] direction in s-Ta<sub>2</sub>O<sub>5</sub> NRs. The associated FFT pattern of s-Ta<sub>2</sub>O<sub>5</sub> NRs exhibits a tail-dragging effect, suggesting numerous disordered structures in the direction perpendicular to [001].

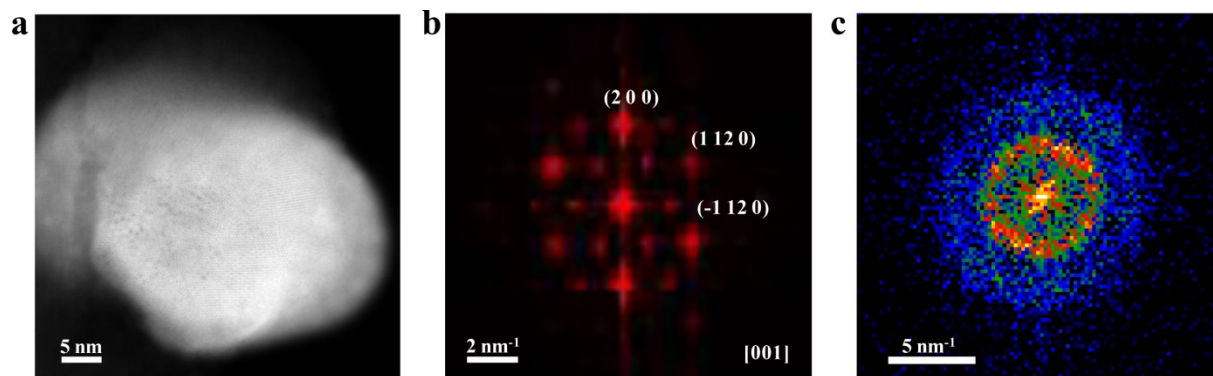

**Fig. S11** Aberration-corrected TEM characterizations of cross-sections for the single s-Ta<sub>2</sub>O<sub>5</sub> nanorod. (a) HAADF-STEM image. (b, c) Corresponding FFT patterns from Fig. 2g, i, respectively. A set of bright diffraction spots in Fig. S11b highlights the highly ordered atomic arrangements in this region. Conversely, a diffraction ring in Fig. S11c indicates a markedly disordered atomic arrangement.

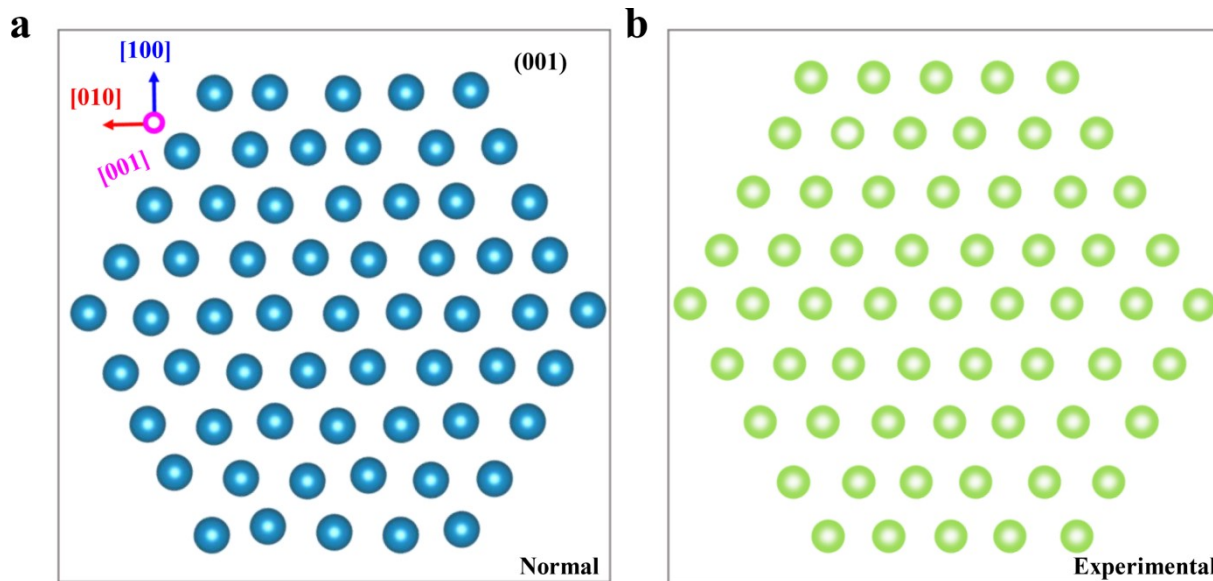

**Fig. S12** Simulated atomic configurations of (001) planes. (a) Normal orthorhombic  $\text{Ta}_2\text{O}_5$ . (b) Ordered regions in  $s\text{-Ta}_2\text{O}_5$  NRs. A comparison of Fig. S12a between 12b reveals that the atomic arrangement in the ordered sections of the  $s\text{-Ta}_2\text{O}_5$  nanorods closely resembles that of the standard orthorhombic  $\text{Ta}_2\text{O}_5$  phase, except for a minor increase in atomic spacing within the  $s\text{-Ta}_2\text{O}_5$  NRs.



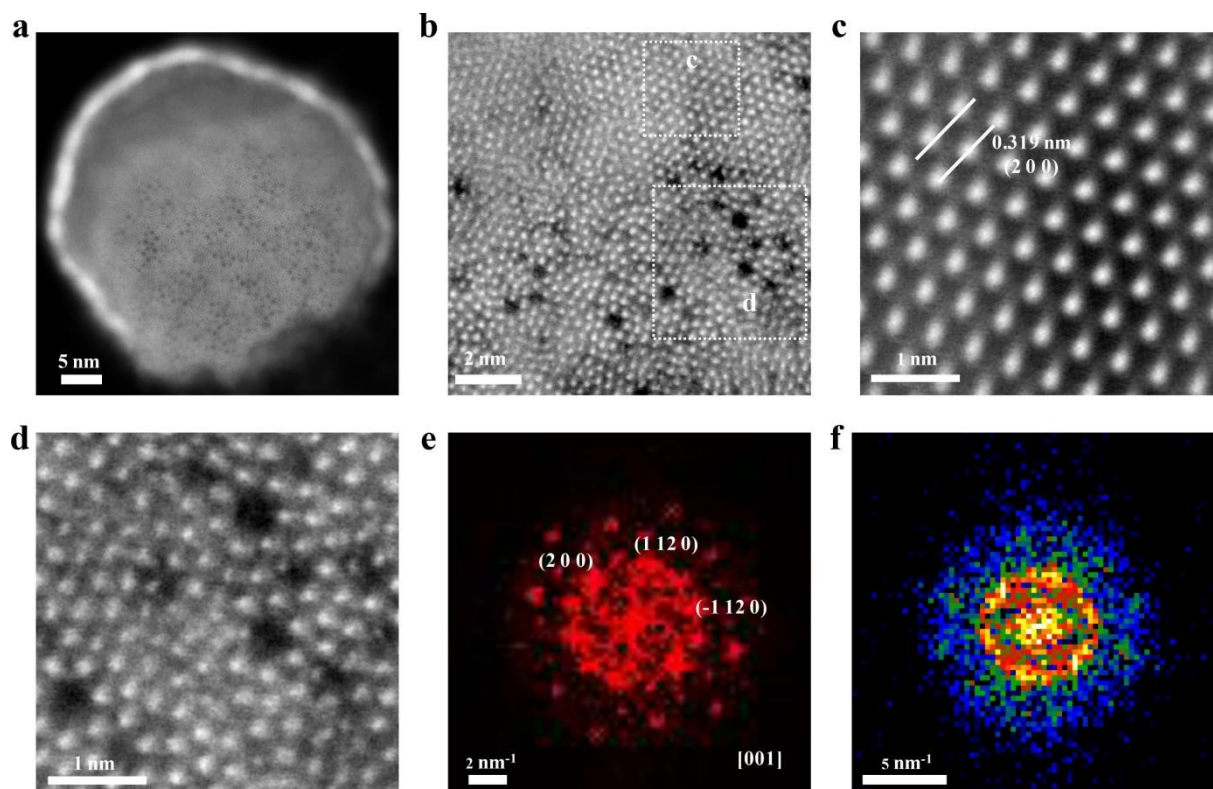

**Fig. S13** Structural characterizations of cross-sections in other s-Ta<sub>2</sub>O<sub>5</sub> NRs via aberration-corrected TEM. (a) HAADF-STEM image. (b) High-resolution HAADF-STEM image. (c, d) Enlarged HAADF-STEM images corresponding to the c and d rectangular square box areas in Fig. S13b, respectively. (e, f) Corresponding FFT patterns of Fig. S13c, d, respectively. The ordered and disordered atomic arrangements, along with a multitude of discernible cavities, can also be clearly observed in Fig. S13b. Fig. S13c shows a highly ordered arrangement of atoms similar to that in the orthorhombic Ta<sub>2</sub>O<sub>5</sub> crystal, but exhibits a slightly larger interplanar spacing of 0.319 nm in the (200) plane ( $d(200)=0.31$  nm, PDF# 25-0922). A set of bright diffraction spots in the corresponding FFT pattern supports the above results. In contrast, Fig. S13d displays a markedly disordered atomic arrangement, replete with numerous cavities, indicative of an amorphous structure. Only diffraction rings are observed in its corresponding FFT pattern.

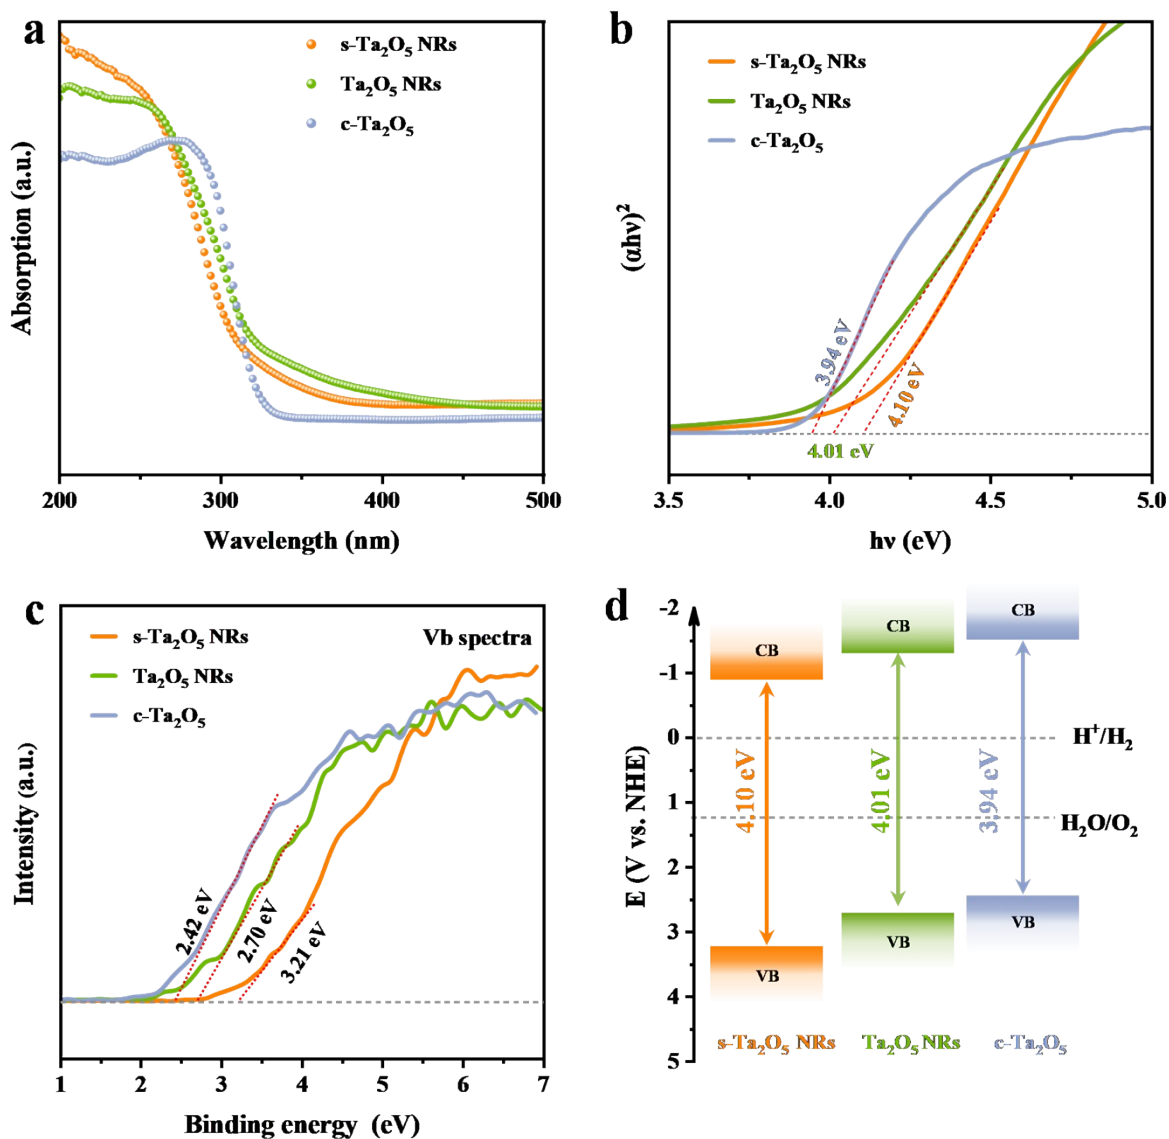

**Fig. S14** Band structures of various  $\text{Ta}_2\text{O}_5$  samples. (a) UV-vis absorption spectra. (b) Plots of  $(\alpha h\nu)^2$  versus photon energy. (c) Valence-band spectra. (d) Band structure diagrams. It is evident that s- $\text{Ta}_2\text{O}_5$  NRs exhibit typical semiconductor properties, with a band structure akin to that of  $\text{Ta}_2\text{O}_5$  NRs and c- $\text{Ta}_2\text{O}_5$ , albeit with minor shifts in the valence and conduction band edges.

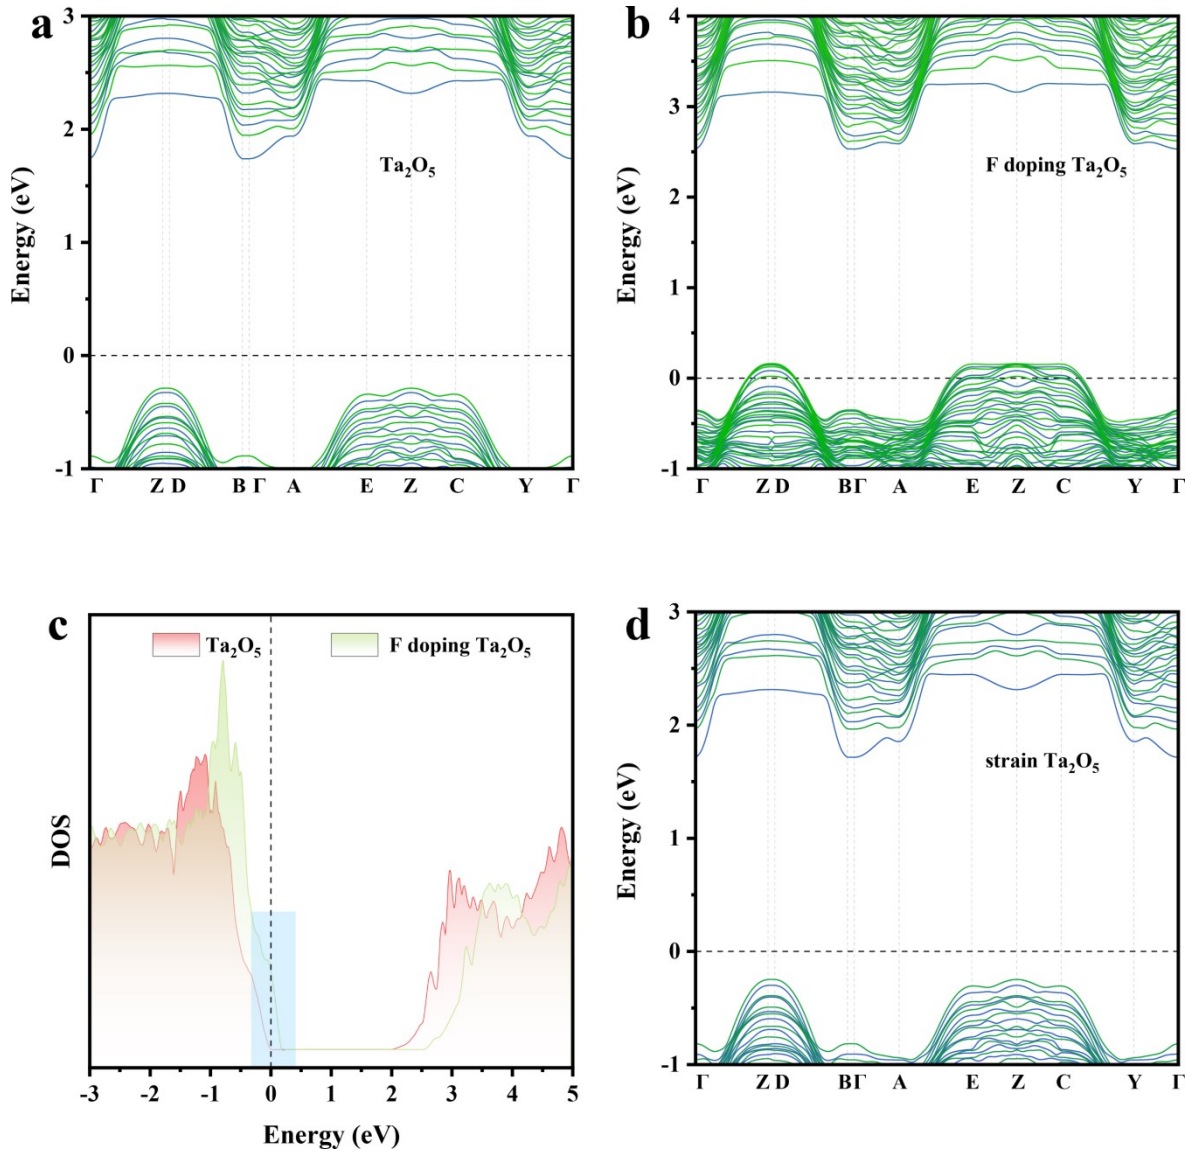

**Fig. S15** Calculated band structures and DOS for various Ta<sub>2</sub>O<sub>5</sub> models. (a) Band structure of the orthorhombic Ta<sub>2</sub>O<sub>5</sub>. (b) Band structure of the F-doped Ta<sub>2</sub>O<sub>5</sub> crystal model. (c) DOS comparison between the conventional and F-doped Ta<sub>2</sub>O<sub>5</sub> crystal models. (d) Band structure of Ta<sub>2</sub>O<sub>5</sub> with tensile strain along the [001] direction.

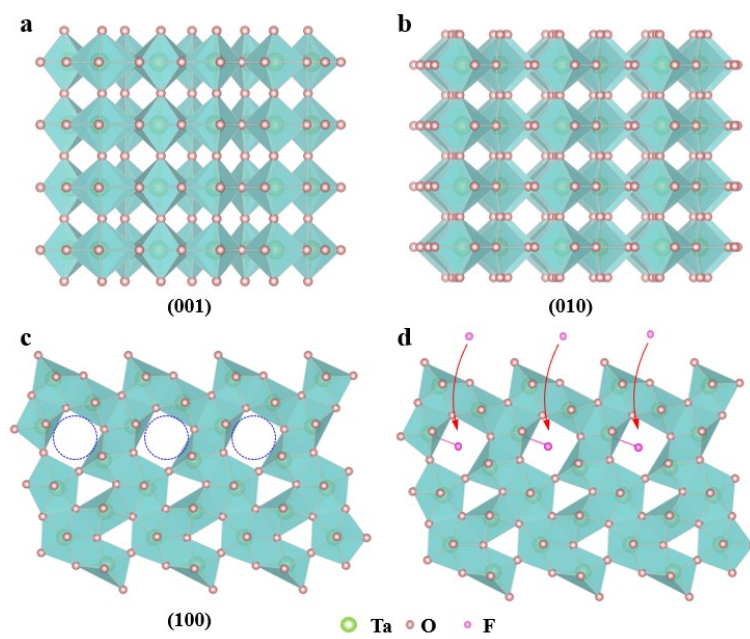

**Fig. S16** The structural model of orthorhombic Ta<sub>2</sub>O<sub>5</sub> and the potential insertion location for F.

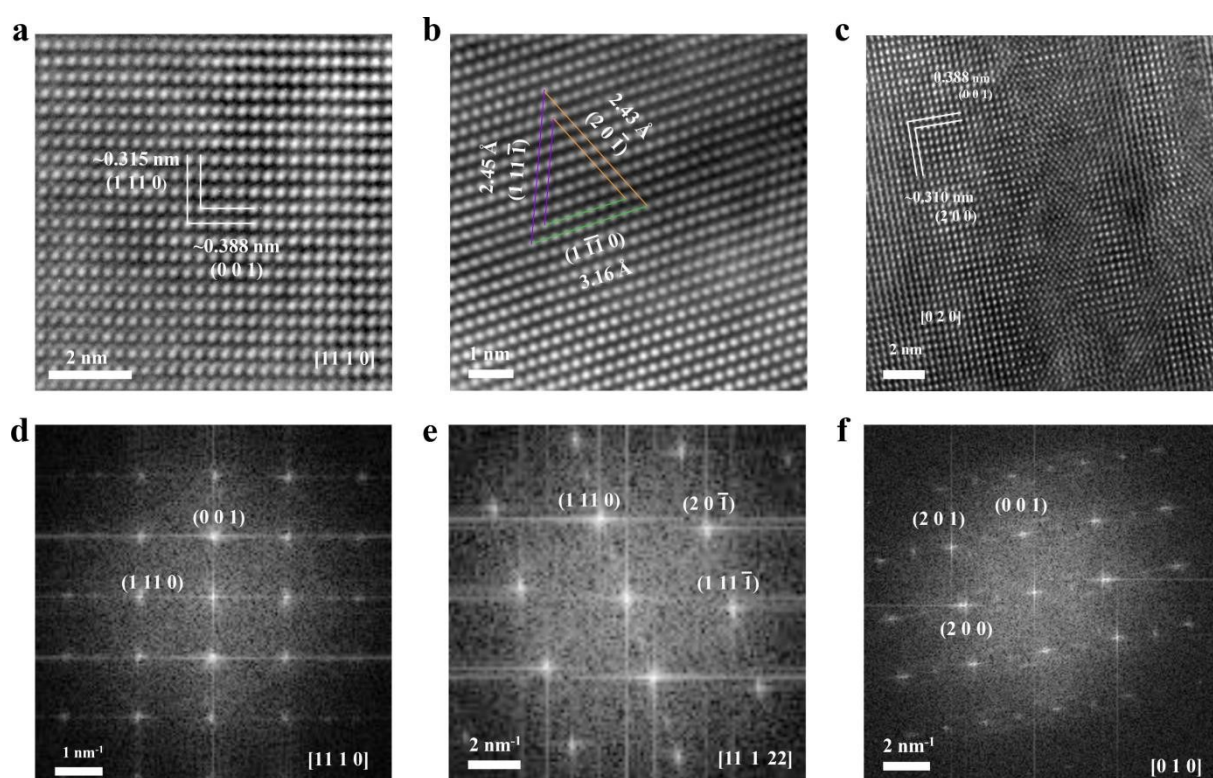

**Fig. S17** Structural characterization of Ta<sub>2</sub>O<sub>5</sub> NRs. HRTEM images taken with the electron beam along different directions. (a) [11 1 0], (b) [11 1 22], (c) [0 1 0]. (d, e, f) The FFT patterns corresponding to Fig. S17a-c respectively. In Fig. S17a, two sets of perpendicular lattice fringes are observed with spacings of  $\sim 0.388$  nm and  $\sim 0.315$  nm, corresponding to the (0 0 1) and (1 -11 0) planes of orthorhombic Ta<sub>2</sub>O<sub>5</sub>, respectively. In Fig. S17b, three sets of well-ordered lattice fringes with spacings of  $\sim 0.315$  nm,  $\sim 0.245$  nm, and  $\sim 0.243$  nm were observed, corresponding to the (1 -11 0), (1 11 -1), and (2 0 -1) planes of orthorhombic Ta<sub>2</sub>O<sub>5</sub>, with interplanar angles of  $71.8^\circ$ ,  $43.3^\circ$ , and  $64.9^\circ$ , respectively, which are consistent with the those of normal Ta<sub>2</sub>O<sub>5</sub>. Fig. S17c shows two sets of perpendicular lattice fringes with spacings of  $\sim 0.388$  nm and  $\sim 0.31$  nm, corresponding to the (0 0 1) and (2 0 0) planes of orthorhombic Ta<sub>2</sub>O<sub>5</sub>. Overall, HRTEM images collected from different directions all displayed well-ordered lattice fringes, fully consistent with the arrangement of a normal Ta<sub>2</sub>O<sub>5</sub> crystal, indicating an orderly atomic arrangement within the Ta<sub>2</sub>O<sub>5</sub> NRs. Moreover, the corresponding FFT patterns all exhibited bright diffraction spots, further confirming their well-crystallized monocrystalline structure. The above results, combined with the XRD, Raman, XAFS, and XPS analyses (Fig. 1c-h, and Fig. S3, S4, S8), consistently indicate that the amorphous F-doped Ta<sub>2</sub>O<sub>5</sub> regions transform into ordered crystalline Ta<sub>2</sub>O<sub>5</sub> after the 750°C annealing treatment to remove

F, leading to the disappearance of the tensile strain in s-Ta<sub>2</sub>O<sub>5</sub>, further suggesting that the local amorphization regions in s-Ta<sub>2</sub>O<sub>5</sub> NRs are the key factor for inducing tensile strain.

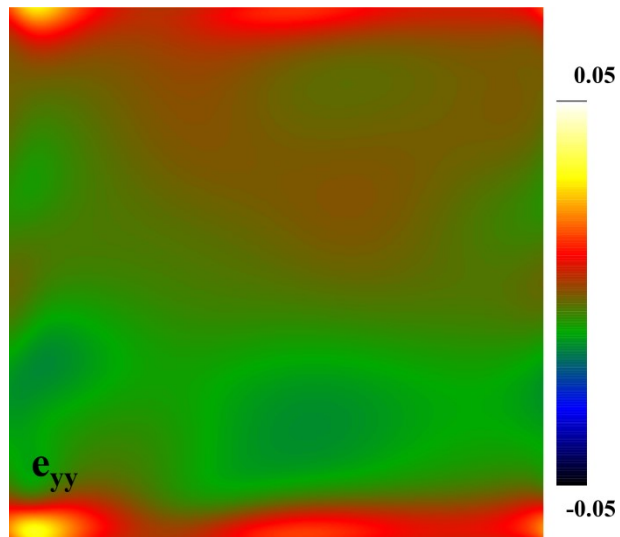

**Fig. S18** The corresponding  $e_{yy}$  strain tensor mapping by GPA of Fig. S17a. It showed no strain within  $Ta_2O_5$  NR, aligning with the XRD and Raman analysis results (Fig. 1c, d).

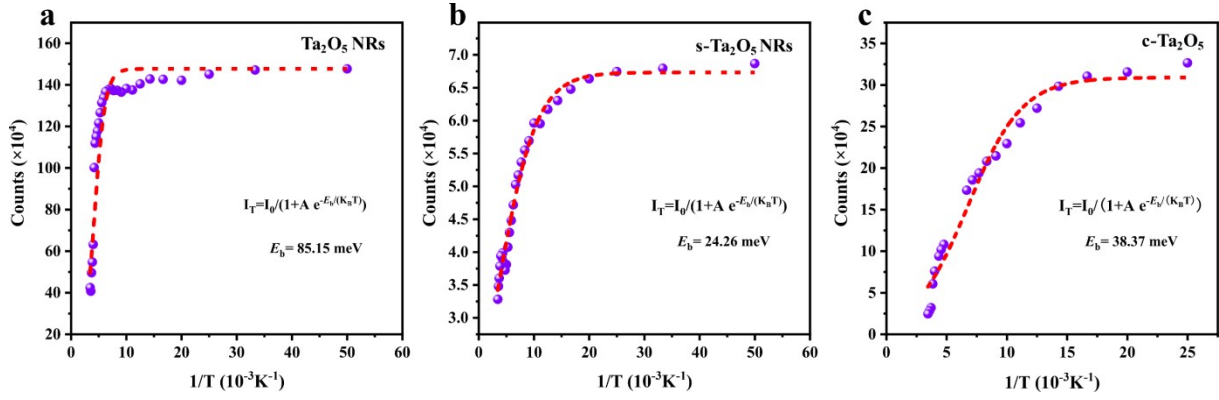

**Fig. S19** Integrated PL emission intensity versus temperature for (a)  $\text{Ta}_2\text{O}_5$  NRs. (b) s- $\text{Ta}_2\text{O}_5$  NRs. (c) c- $\text{Ta}_2\text{O}_5$ . The  $E_b$  of  $\text{Ta}_2\text{O}_5$  NRs, s- $\text{Ta}_2\text{O}_5$  NRs and c- $\text{Ta}_2\text{O}_5$  is calculated to be 85.15, 24.26, 38.37 meV, by employing the Arrhenius equation  $I_T = I_0 / (1 + A \exp(-E_b / (k_B T)))$  to fit the acquired temperature-dependent PL data.



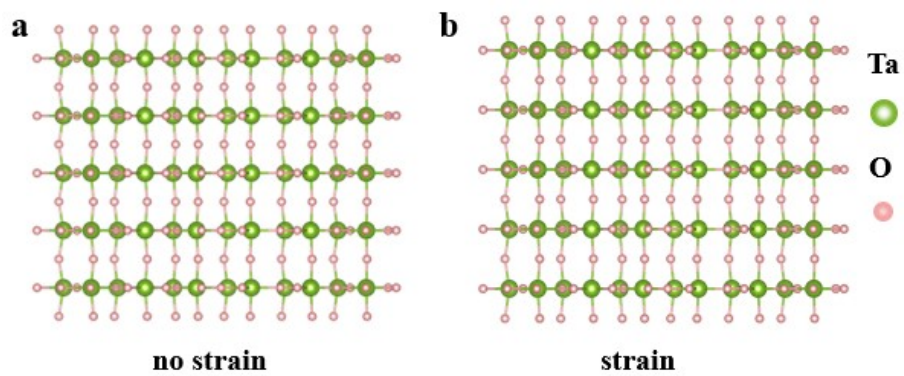

**Fig. S20** The structural model of orthorhombic  $\text{Ta}_2\text{O}_5$  (a) without and (b) with tensile strain.

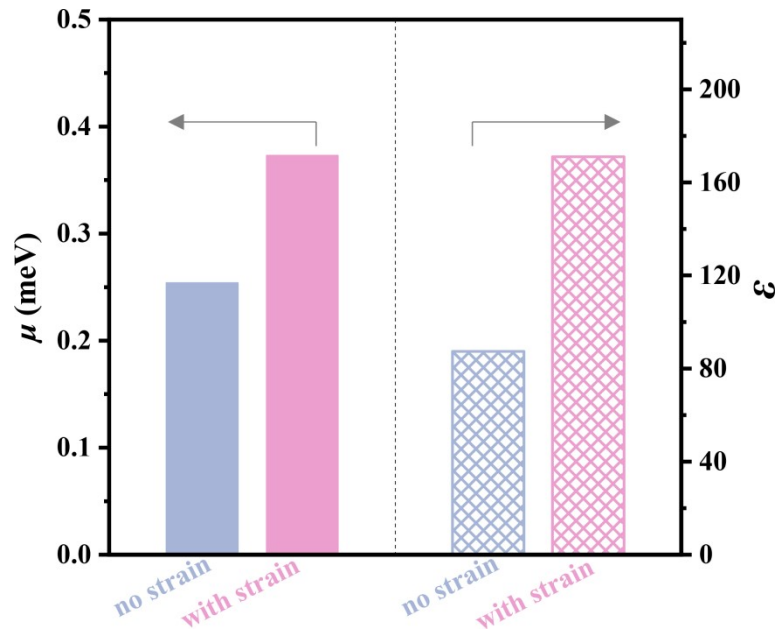

**Fig. S21** Calculated  $\mu$  and  $\epsilon^2$  values for  $\text{Ta}_2\text{O}_5$  crystals along the [001] direction, with and without a tensile strain applied in this direction. Fig. S21 illustrates that a tensile strain along the [001] direction marginally increases  $\mu$ , while  $\epsilon_r^2$  experiences a considerable increase, resulting in an enhanced dielectric screening effect. Consequently, the introduction of a tensile strain along the [001] direction is calculated to cause a 61.67% decrease in  $E_b$ , aligning well with the experimentally observed trends in  $E_b$  variation.

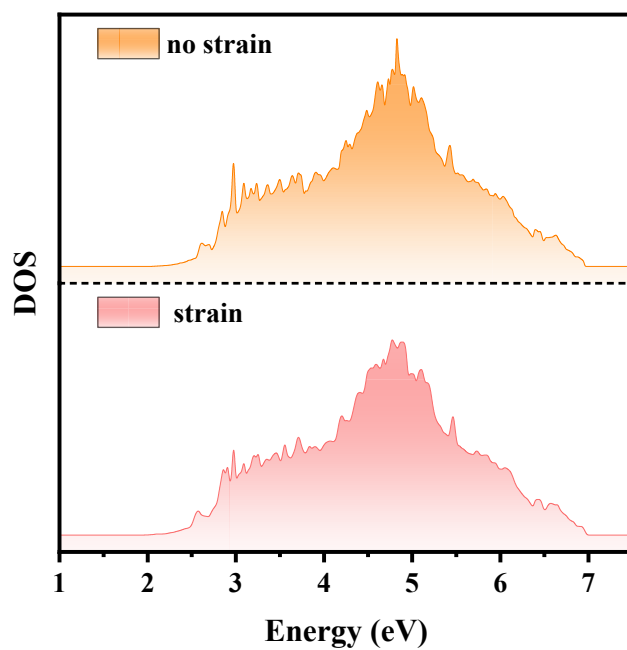

**Fig. S22** O  $2p$  PDOS for Ta<sub>2</sub>O<sub>5</sub> models with/without tensile strain along the [001] direction. As shown in Fig. S22, after applying a tensile strain, Ta<sub>2</sub>O<sub>5</sub> models, irrespective of the presence or absence of tensile strain along the [001] direction, demonstrate comparable O  $2p$  PDOS behavior above the Fermi surface, albeit with a slight reduction in intensity.

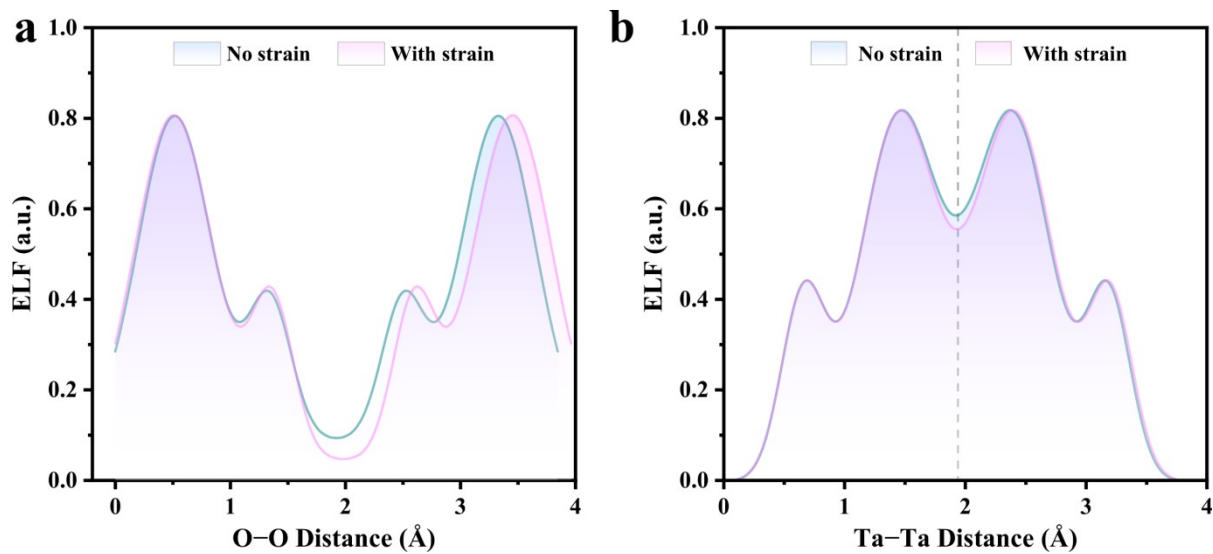

**Fig. S23** ELF line profiles. (a) O–O and (b) Ta–Ta interatomic pairs in  $\text{Ta}_2\text{O}_5$ , with and without a tensile strain along the [001] direction.

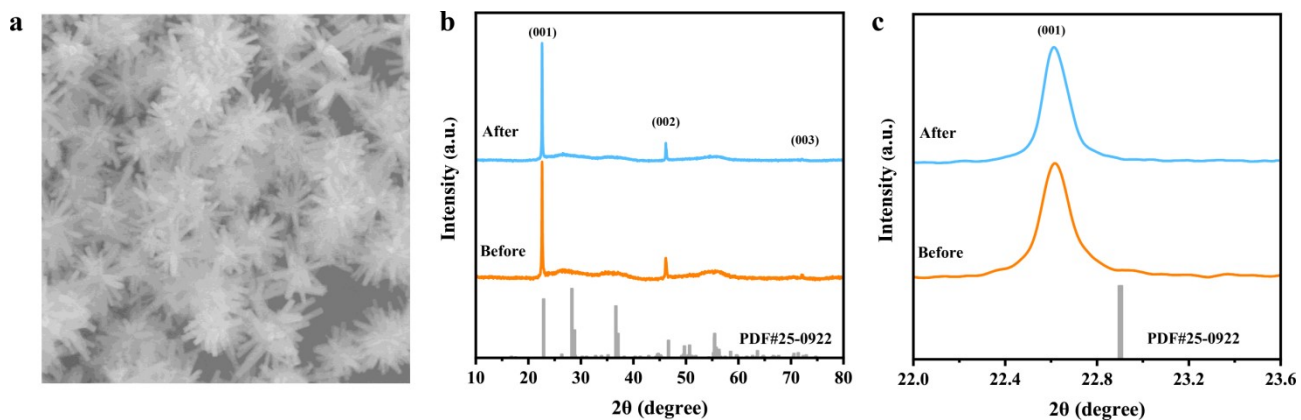

**Fig. S24** Structural characterizations of s-Ta<sub>2</sub>O<sub>5</sub> NRs before and after photocatalysis. (a) SEM image after photocatalysis. (b) XRD patterns. (c) Enlarged view of the (001) peaks. Fig. S24 shows that the morphology and phase of s-Ta<sub>2</sub>O<sub>5</sub> NRs were mostly unaltered following the photocatalytic reaction, indicating their high stability.

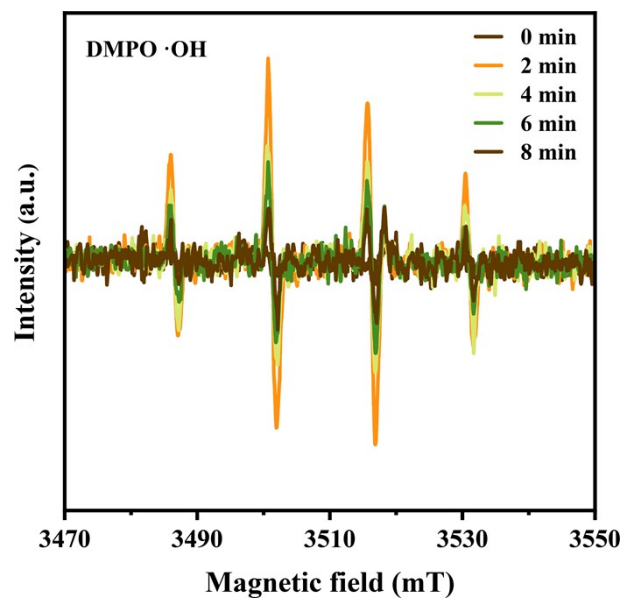

**Fig. S25** In-situ ESR spectra of DMPO-trapped  $\cdot\text{OH}$  radicals in  $\text{s-Ta}_2\text{O}_5$  NRs under photoillumination.

**Table S1 EXAFS curves fitting results**

| Sample                                          | Shell  | N   | R (Å) | $\Delta\sigma^2*10^3$<br>(Å <sup>2</sup> ) | $\Delta E_0$<br>(eV) | R-factor |
|-------------------------------------------------|--------|-----|-------|--------------------------------------------|----------------------|----------|
| Ta <sup>a</sup>                                 | Ta-Ta1 | 8.0 | 2.86  | 5.08                                       | 3.7                  | 0.8      |
|                                                 | Ta-Ta2 | 6.0 | 3.30  | 6.86                                       | 5.7                  |          |
| Ta <sub>2</sub> O <sub>5</sub> NRs <sup>b</sup> | Ta-O1  | 4.0 | 1.89  | 11.61                                      | -5.1                 | 0.3      |
|                                                 | Ta-O2  | 2.0 | 2.04  | 4.35                                       | 8.6                  |          |
| 1-s-Ta <sub>2</sub> O <sub>5</sub> <sup>b</sup> | Ta-F   | 0.5 | 1.81  | 2.75                                       | -4.5                 | 0.6      |
|                                                 | Ta-O   | 5.6 | 1.95  | 11.92                                      | 2.0                  |          |
| 2-s-Ta <sub>2</sub> O <sub>5</sub> <sup>b</sup> | Ta-F   | 0.4 | 1.81  | 11.94                                      | -7.3                 | 0.6      |
|                                                 | Ta-O1  | 1.4 | 1.90  | 6.32                                       | 1.8                  |          |
|                                                 | Ta-O2  | 4.0 | 2.05  | 2.78                                       | 1.8                  |          |

N, coordination number; R, distance between absorber and backscatter atoms;  $\sigma^2$ , Debye-Waller factor to account for both thermal and structural disorders;  $\Delta E_0$ , inner potential correction; R-factor (%) indicate the goodness of the fit.

The obtained  $S_0^2$  of Ta and Pt foil were 0.95, and they were fixed in the subsequent fitting of Ta L<sub>3</sub>-edge for the catalyst, respectively.

<sup>a</sup>Ta L<sub>3</sub>-edge EXAFS curves fitting parameters:  $\Delta k = 3.0 - 12.0 \text{ \AA}^{-1}$ ,  $\Delta r = 1.0 - 3.5 \text{ \AA}$ .

<sup>b</sup>Ta L<sub>3</sub>-edge EXAFS curves fitting parameters:  $\Delta k = 3.0 - 12.0 \text{ \AA}^{-1}$ ,  $\Delta r = 1.0 - 2.4 \text{ \AA}$ .

## Note S1 Raman spectra analyses

Raman spectra of Fig. 1d reveals seven prominent vibrational modes inherent to orthorhombic Ta<sub>2</sub>O<sub>5</sub>, with peaks at 65.5, 97.4, 195.3, 243.9, 615.4, 702.4, and 843.2 cm<sup>-1</sup>. These peaks within the 100-450 cm<sup>-1</sup> range are predominantly associated with the bending vibrations of the O-Ta-O bonds within the TaO<sub>6</sub> octahedra, while those in the 450-900 cm<sup>-1</sup> range are indicative of Ta-O stretching vibrations related to edge-sharing polyhedra distortions.<sup>8-11</sup> Specifically, the peaks at 243.9, 615.4, 702.4, and 843.2 cm<sup>-1</sup> are respectively ascribed to the bending vibration of bridging Ta-O-Ta, the symmetric stretching vibration of Ta-O, the asymmetric stretching vibration of bridging Ta-O-Ta, and the higher-order symmetric stretching vibration of Ta-O, respectively. A slight redshift in the Raman signal of s-Ta<sub>2</sub>O<sub>5</sub> NRs, specifically in the O-Ta-O and Ta-O stretching vibrations, corroborates the introduction of tensile strain within the lattice. Additionally, an increase in the relative intensity ratio of certain vibrational modes in s-Ta<sub>2</sub>O<sub>5</sub> suggests a rise in edge-sharing Ta-O bonds and a concurrent emergence of amorphous regions. The reduced vibrational intensity further points to a reduction in crystallinity for s-Ta<sub>2</sub>O<sub>5</sub>.



## References

- 1 Kresse and Hafner, *Phys. Rev. B*, 1993, **47**, 558-561.
- 2 V. Wang, N. Xu, J.-C. Liu, G. Tang and W.-T. Geng, *Comput. Phys. Commun.*, 2021, **267**, 108033.
- 3 J. H. Choi, P. Cui, H. P. Lan and Z. Y. Zhang, *Phys. Rev. Lett.*, 2015, **115**, 066403.
- 4 B. Silvi and A. Savin, *Nature*, 1994, **371**, 683-686.
- 5 E. L. Lee and I. E. Wachs, *J. Phys. Chem. C*, 2007, **111**, 14410-14425.
- 6 M. Baranowski and P. Plochocka, *Adv. Energy Mater.*, 2020, **10**, 1903659.
- 7 M. Bokdam, T. Sander, A. Stroppa, S. Picozzi, D. D. Sarma, C. Franchini and G. Kresse, *Sci. Rep.*, 2016, **6**, 28618.
- 8 V. Janakiraman, V. Tamilnayagam, R. S. Sundararajan, S. Suresh and C. S. Biju, *J. Mater. Sci. Mater. Electron.*, 2021, **32**, 9244-9252.
- 9 H. Benchorfi, S. Chenu, J.-R. Duclere, C. Genevois, M. Allix, E. Veron, J. Cornette, M. Colas, V. A. G. Rivera, V. Fuertes, F. Brisset, P. Carles, S. Aouji, P. Thomas, Y. Messaddeq and G. Delaizir, *J. Eur. Ceram. Soc.*, 2024, **44**, 1131-1142.
- 10 Z. Zhang, Z. Li, L. Wang, J. Li, J. Pan, S. Wang, C. Zhang, Z. Li, Q. Peng and X. Xiu, *Opt. Express*, 2021, **29**, 34552-34564.
- 11 P. S. Dobal, R. S. Katiyar, Y. Jiang, R. Guo and A. S. Bhalla, *J. Raman Spectrosc.*, 2000, **31**, 1061-1065.
